# Supplementary material for: A novel HDAC inhibitor, CG200745, inhibits pancreatic cancer cell growth and overcomes gemcitabine resistance
Source: PubMed Central journal article supplement (PMC5278546; doi:10.1038/srep41615), 2017-01-30
Supplement: srep41615-s1.pdf [file srep41615-s1.pdf]

**A novel HDAC inhibitor, CG200745, inhibits pancreatic cancer cell  
growth and overcomes gemcitabine resistance**

Hee Seung Lee<sup>1</sup>, Soo Been Park<sup>1</sup>, Sun A Kim<sup>1</sup>, Sool Ki Kwon<sup>2</sup>, Hyunju Cha<sup>2</sup>, Do Young Lee<sup>2</sup>,  
Seonggu Ro<sup>2</sup>, Joong Myung Cho<sup>2</sup>, Si Young Song<sup>1†</sup>

*<sup>1</sup>Division of Gastroenterology, Department of Internal Medicine,  
Yonsei University College of Medicine, Seoul, Korea*

*<sup>2</sup>CrystalGenomics, Inc., 5F, Bldg A, Korea Bio Park, Seongnam, Korea*

*Running Title: HDAC inhibitor, CG200745, in pancreatic cancer*

**Corresponding author:**

Si Young Song, MD, PhD

Division of Gastroenterology, Department of Internal Medicine,

Yonsei University College of Medicine,

50-1 Yonsei-ro, Seodaemun-gu, Seoul 120-752, Korea

Phone: +82-2-2228-1957 Fax: +82-2-2227-7900

E-mail: [sysong@yuhs.ac](mailto:sysong@yuhs.ac)

Supplementary Figure 1. Anti-proliferative activities of erlotinib against three pancreatic cancer cell lines and two gemcitabine-resistant cell lines. Cell viability curve based on the erlotinib concentration in five pancreatic cancer cell lines. The doses of erlotinib equivalent to IC 20~30 were selected.

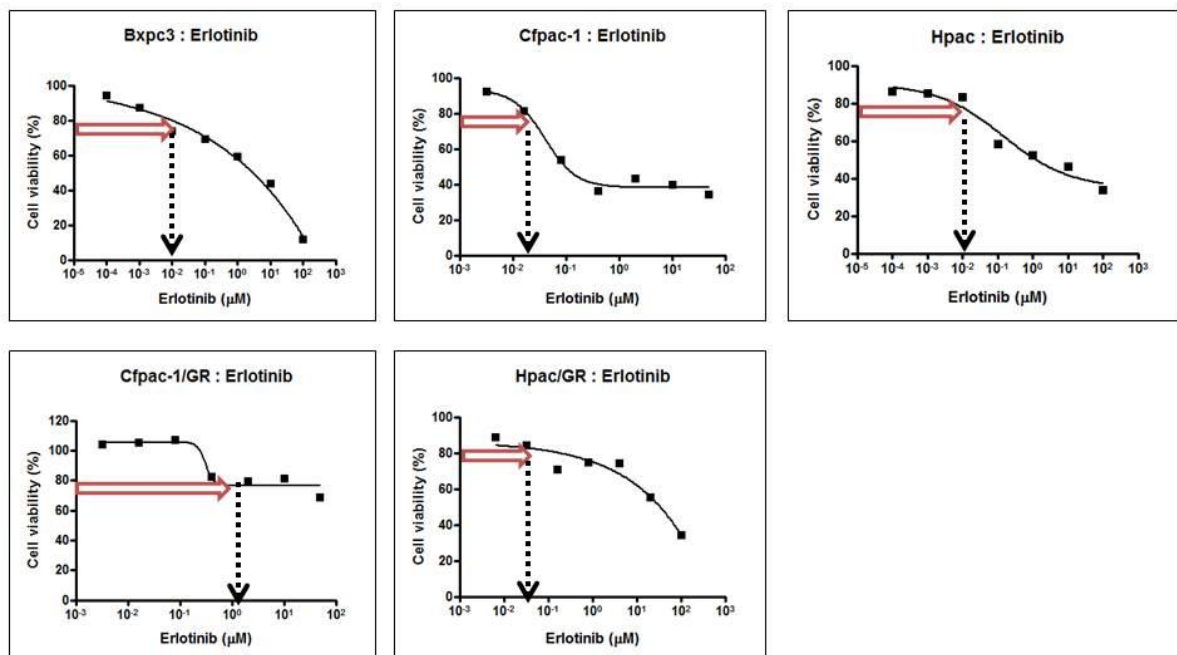

Supplementary Figure 2. Synergistic effect of CG200745 combined with gemcitabine/erlotinib (A, Cfpac1; B, HPAC). The doses of erlotinib and CG200745 were equivalent to IC 20~30. The growth of pancreatic cells was analyzed via an MTT assay after treatment with various concentrations of gemcitabine over a time-course (0–72 h). The anti-proliferative effect of CG200745 with gemcitabine/erlotinib is more enhanced than the effect of gemcitabine/erlotinib without CG200745 in pancreatic cancer cells. Western Blot analysis to investigate the pancreatic cancer cell apoptosis and analyze the molecular pathway related to CG200754. CG200745 combined with gemcitabine/erlotinib induces apoptosis through caspase-3 activation. Immunofluorescent staining of cleaved caspase-3 expressing cells. Fluorescence signals specific to cleaved caspase-3 antibodies were visualized as green, and DAPI (blue) was used to indicate nuclei. \* or \*\* indicates significant differences compared with the control ( $p < 0.05$  or  $p < 0.01$ ). G, gemcitabine; CG, CG200745; E, erlotinib

(A)

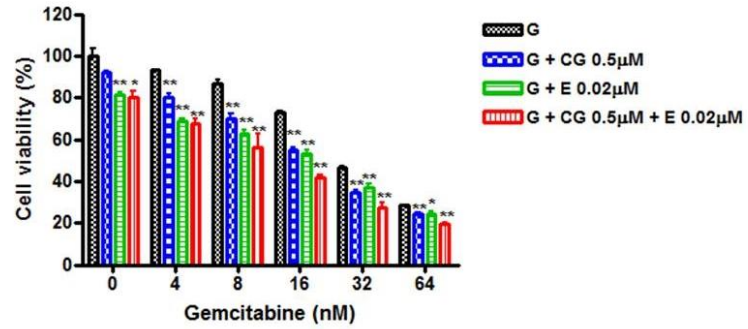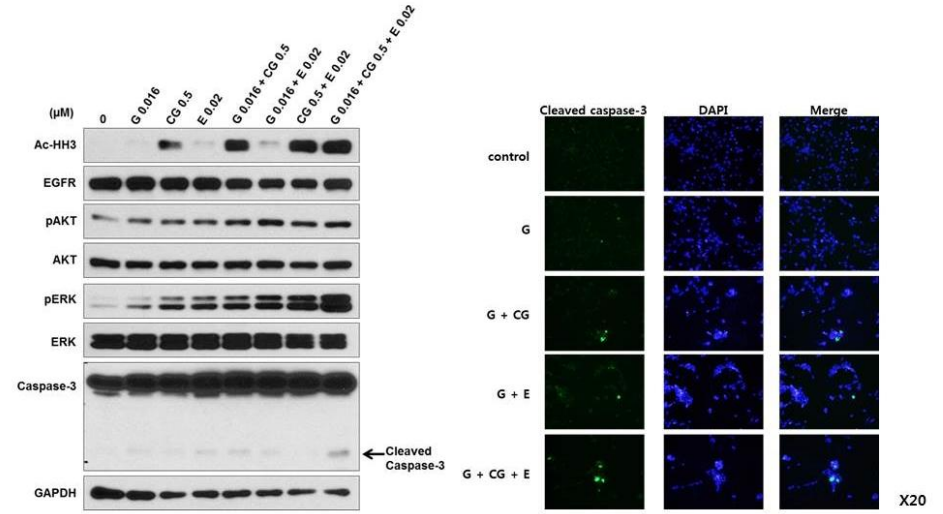

(B)

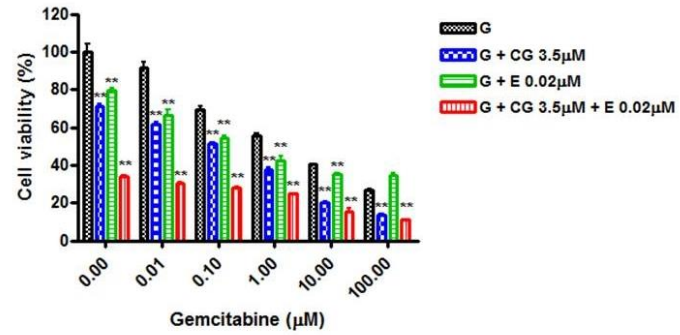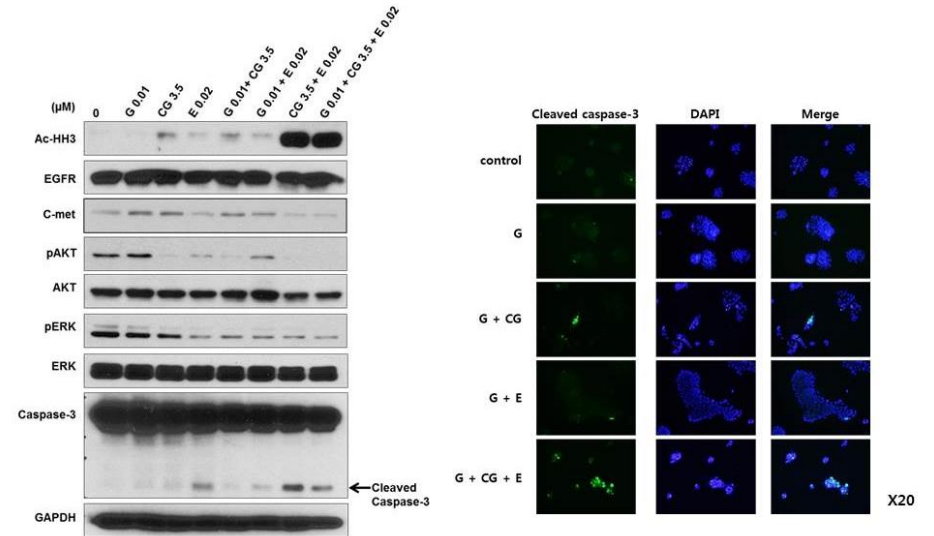

Supplementary Figure 3. Cell viability curve based on the concentration of CG200745 and gemcitabine in gemcitabine-resistant cell lines (A, gemcitabine-resistant Cfpac-1; B, gemcitabine-resistant HPAC)

(A)

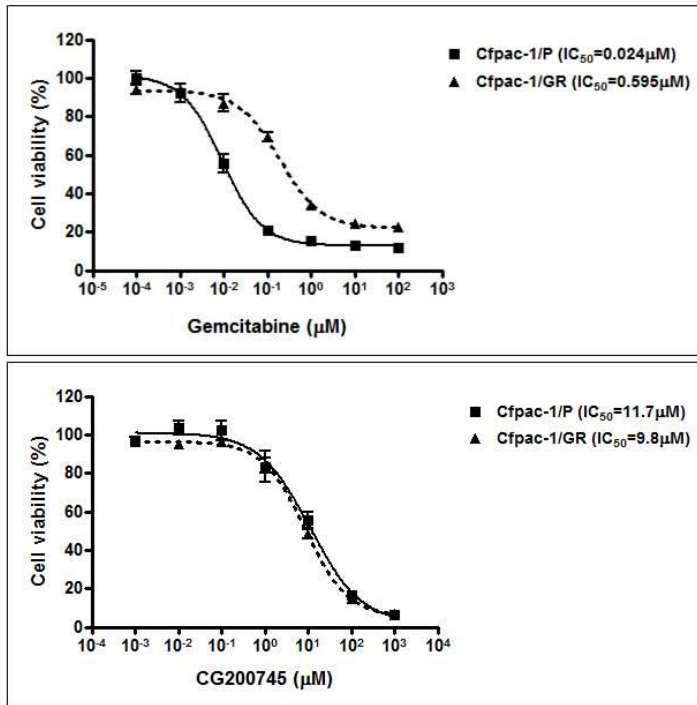

(B)

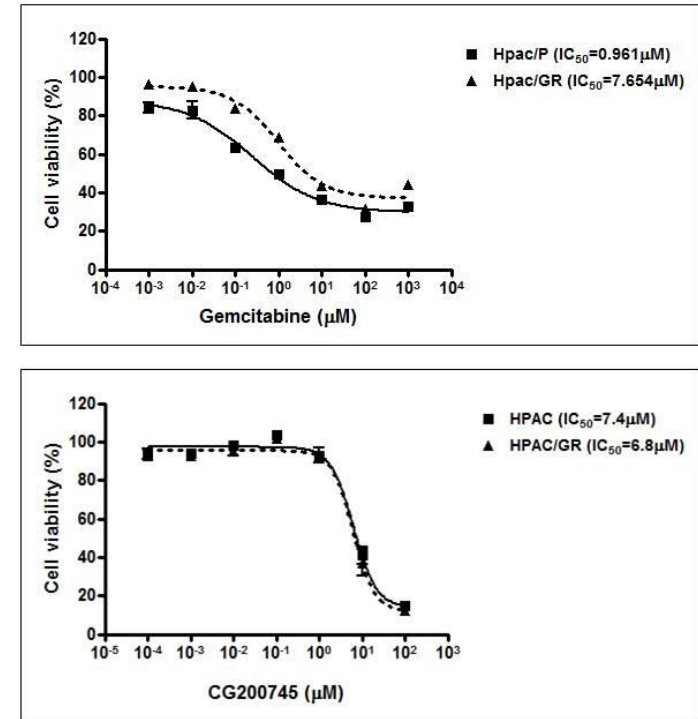

Supplementary Figure 4. HDAC inhibitor, CG200745 selectively decreases HDAC7 expression in gemcitabine-resistant pancreatic cancer cells.

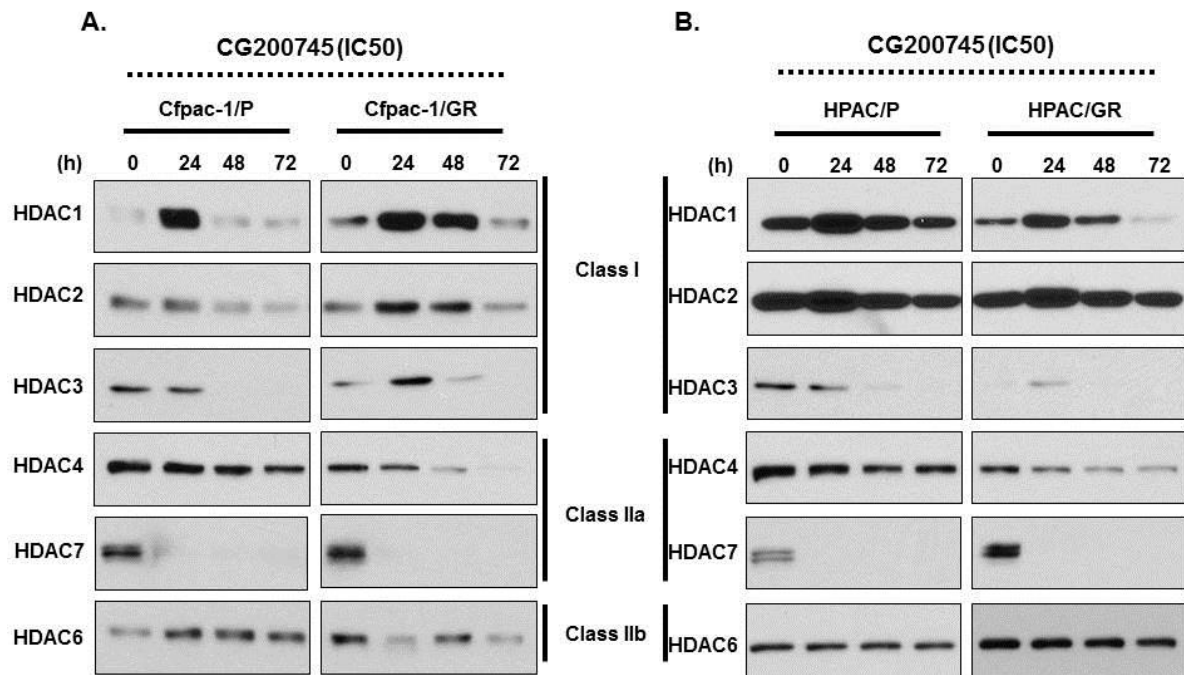

Supplementary Figure 5. Anti-proliferative and pro-apoptotic activities of CG200745 against pancreatic cancer cells. CG200745 induces histone-H3 acetylation and increases BAX and p21 expression related to apoptosis, Cell line; Cfpac-1.

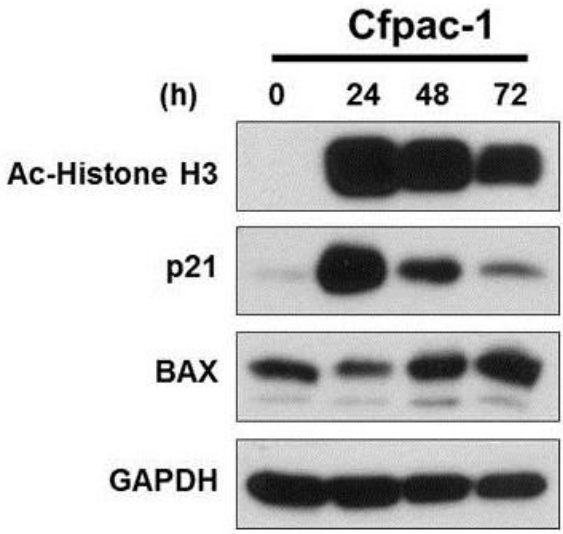

Supplementary table 1. Combination index (CI) according to concentration of CG200745, gemcitabine, and erlotinib in the three pancreatic cancer cell lines and two gemcitabine-resistant cell lines (A, BxPC3; B, Cfpac1; C, HPAC; D, gemcitabine-resistant Cfpac-1; E, gemcitabine-resistant HPAC). CI < 0.1, very strong synergism; CI 0.1–0.3, strong synergism; CI 0.3–0.9, synergism; CI 0.9–1.1, additive effect; CI > 1.1, antagonism

(A)

| <b>Combination index</b> | <b>0.74</b> | <b>0.70</b> | <b>0.47</b> | <b>0.45</b> |
|--------------------------|-------------|-------------|-------------|-------------|
| Gemcitabine( $\mu$ M)    | 0.001       | 0.010       | 0.100       | 1.000       |
| Erlotinib( $\mu$ M)      | 0.015       | 0.015       | 0.015       | 0.015       |
| CG200745( $\mu$ M)       | 0.288       | 0.288       | 0.288       | 0.288       |

(B)

| <b>Combination index</b> | <b>0.73</b> | <b>0.59</b> | <b>0.54</b> | <b>0.53</b> | <b>0.64</b> |
|--------------------------|-------------|-------------|-------------|-------------|-------------|
| Gemcitabine(nM)          | 4           | 8           | 16          | 32          | 64          |
| Erlotinib( $\mu$ M)      | 0.02        | 0.02        | 0.02        | 0.02        | 0.02        |
| CG200745( $\mu$ M)       | 0.5         | 0.5         | 0.5         | 0.5         | 0.5         |

(C)

| <b>Combination index</b> | <b>0.52</b> | <b>0.51</b> | <b>0.49</b> | <b>0.41</b> | <b>0.41</b> |
|--------------------------|-------------|-------------|-------------|-------------|-------------|
| Gemcitabine( $\mu$ M)    | 0.01        | 0.10        | 1.00        | 10.00       | 100.00      |
| Erlotinib( $\mu$ M)      | 0.02        | 0.02        | 0.02        | 0.02        | 0.02        |
| CG200745( $\mu$ M)       | 3.5         | 3.5         | 3.5         | 3.5         | 3.5         |

(D)

| <b>Combination index</b> | <b>&lt;0.01</b> | <b>&lt;0.01</b> | <b>&lt;0.01</b> | <b>0.01</b> |
|--------------------------|-----------------|-----------------|-----------------|-------------|
| Gemcitabine(nM)          | 64              | 256             | 1024            | 4096        |
| Erlotinib( $\mu$ M)      | 4               | 4               | 4               | 4           |
| CG200745( $\mu$ M)       | 2               | 2               | 2               | 2           |

(E)

| <b>Combination index</b> | <b>0.42</b> | <b>0.38</b> | <b>0.38</b> | <b>0.14</b> | <b>0.13</b> |
|--------------------------|-------------|-------------|-------------|-------------|-------------|
| Gemcitabine( $\mu$ M)    | 0.01        | 0.10        | 1.00        | 10.00       | 100.00      |
| Erlotinib( $\mu$ M)      | 0.04        | 0.04        | 0.04        | 0.04        | 0.04        |
| CG200745( $\mu$ M)       | 2           | 2           | 2           | 2           | 2           |



Supplementary Table 2. Primer sequences used for RT-PCR

| <b>Gene</b>                     | <b>Sense</b>             | <b>Antisense</b>        |
|---------------------------------|--------------------------|-------------------------|
| <i>ABCG2</i>                    | TATGAGTGGCTTATCCTGCT     | CACTGATCCTTCCATCTTGT    |
| <i>hENT1</i>                    | GACAACCAGTCACCAGCCTCAG   | AGAGCATCCAGCTGCACCTTCA  |
| <i>MRP1</i>                     | CTGACAAGCTAGACCATGAATGT  | TCACACCAAGCCGGCGTCTTT   |
| <i>MRP3</i>                     | GGACCCTGCGCATGAACCTG     | AGGCAAGTCCAGCATCTCTGG   |
| <i>MRP4</i>                     | GGATCCAAGAACTGATGAGTTAAT | TCACAGTGCTGTCTCGAAAATAG |
| <i>MRP5</i>                     | GCTG TTCAGTGGCACTGTCAG   | TCAGCCCTTGACAGCGACCTT   |
| <i><math>\beta</math>-Actin</i> | GGCATCCTCACCTGAAGTA      | GGGGTGTTGAAGGTCTCAA     |
